# Supplementary material for: A nano-fibrous platform of copolymer patterned surfaces for controlled cell alignment
Source: Royal Society of Chemistry journal article supplement (doi:10.1039/c8ra03527j), 2018-01-01
Supplement: c8ra03527j1.pdf [file c8ra03527j1.pdf]

**Supplementary Information for**

# A Nano-Fibrous Platform of Copolymer Patterned Surfaces for Controlled Cell Alignment

Kai Zhang <sup>a</sup>, Alexandra Arranja <sup>a,b</sup>, Hongyu Chen <sup>c</sup>, Serhii Mytnyk <sup>a</sup>, Yiming Wang <sup>a</sup>

Sander Oldenhof <sup>a,d</sup>, Jan H. van Esch <sup>a</sup>, Eduardo Mendes <sup>a,\*</sup>

<sup>a</sup> Advanced Soft Matter Group, Department of Chemical Engineering, Delft University of Technology, Delft, 2629 HZ, The Netherlands

<sup>b</sup> Department of Radiology and Nuclear medicine, University Medical Center Utrecht, Utrecht, 3584 CX, The Netherlands

<sup>c</sup> Department of Chemical Engineering, Virginia Polytechnic Institute and State University, Blacksburg, VA 24061, USA

<sup>d</sup> Netherlands Forensic Institute, Den Haag, 2497 GB, The Netherlands

**\*Corresponding author :**

Tel: +31 (0) 15 278 2623

E-mail address: e.mendes@tudelft.nl ,

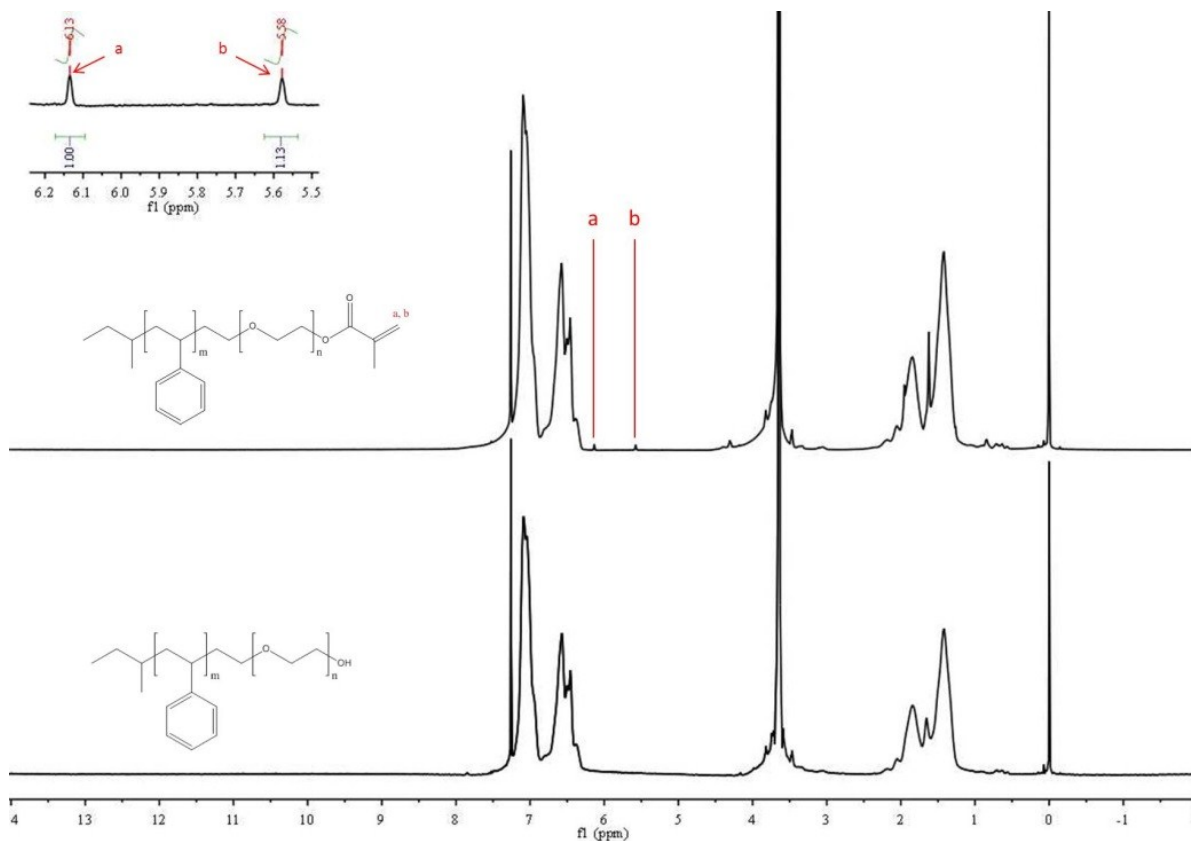

**Fig. S1** <sup>1</sup>H-NMR spectra of PS-*b*-PEO and PS-*b*-PEO-MA in CDCl<sub>3</sub>. The characteristic peaks of terminal methacryloyl group are assigned in the figure and magnified in insert figure.

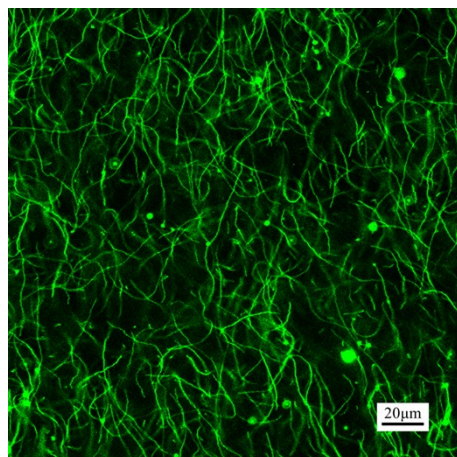

**Fig. S2** Confocal microscopy image of cross-linkable PS-*b*-PEO micelles prepared by evaporation-induced self-assembly method.

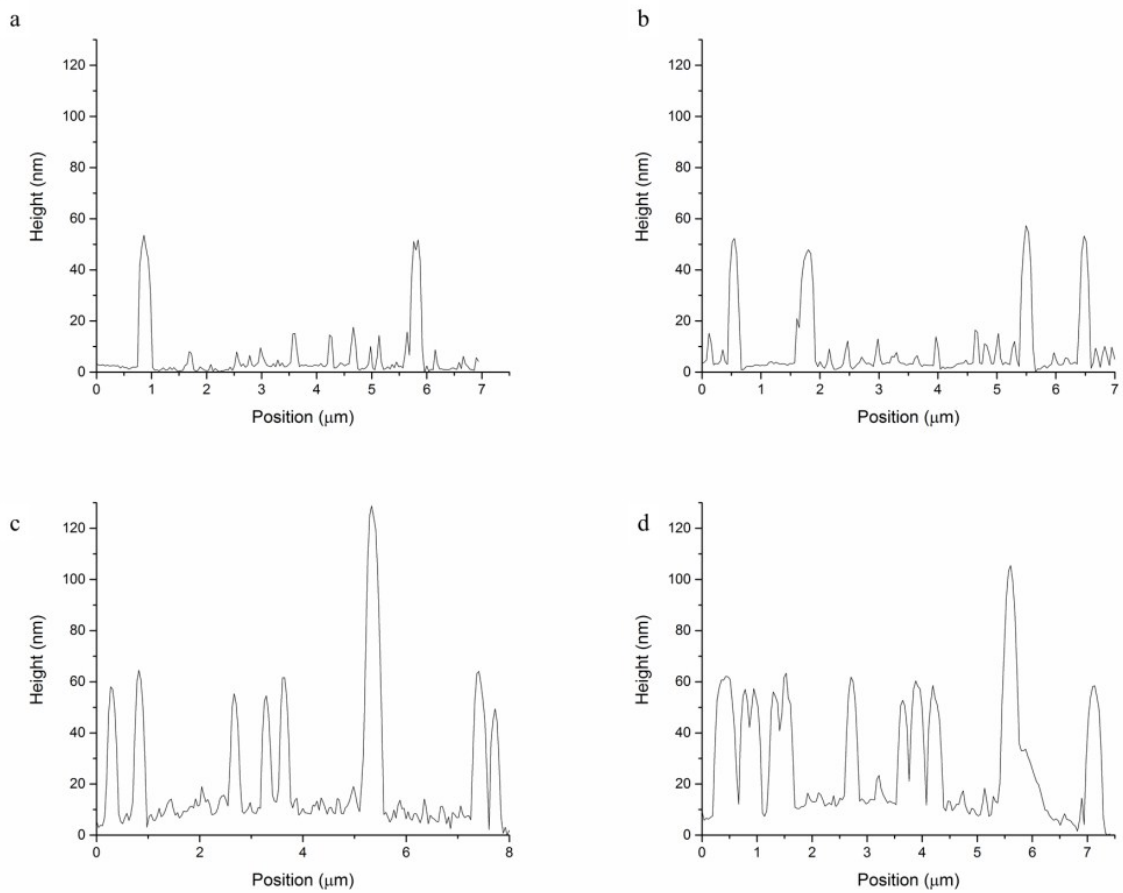

**Fig. S3** Line scan profiles of the micelles printed and cross-linked on the glass surface: (a) 1, (b) 5, (c) 10, (d) 20 printing times.
